# Supplementary material
Source: MDPI journal article supplement (https://www.mdpi.com/1099-4300/24/10/1348)
Supplement: s1 [file s1]

## Supplementary Materials

**Table S1.** Balanced accuracies of the approximate entropy of the small subset of data with the test values of  $m$  and  $r_{SD}$ . Average reports the average accuracy across the band. Ordered from the highest average balanced accuracy to the lowest in the Average column.

| $m$ | $r_{SD}$ | Broad         | Delta         | Theta         | Alpha         | Beta          | Gamma         | Average       |
|-----|----------|---------------|---------------|---------------|---------------|---------------|---------------|---------------|
| 2   | 0.2      | 81.81%        | <b>74.40%</b> | <b>79.24%</b> | <b>81.16%</b> | 72.33%        | <b>68.78%</b> | <b>76.29%</b> |
| 1   | 0.25     | 79.77%        | 73.27%        | 75.31%        | 77.39%        | 74.98%        | 64.06%        | 74.13%        |
| 2   | 0.25     | 81.66%        | 69.85%        | 76.43%        | 75.43%        | <b>75.34%</b> | 60.59%        | 73.22%        |
| 1   | 0.15     | 81.66%        | 73.36%        | 77.93%        | 73.40%        | 70.55%        | 61.69%        | 73.10%        |
| 1   | 0.1      | <b>82.30%</b> | 71.99%        | 76.23%        | 72.04%        | 70.34%        | 63.10%        | 72.66%        |
| 2   | 0.1      | 81.49%        | 68.01%        | 77.39%        | 73.14%        | 70.62%        | 63.82%        | 72.41%        |
| 2   | 0.15     | 80.29%        | 71.65%        | 71.51%        | 73.08%        | 75.09%        | 59.03%        | 71.77%        |
| 1   | 0.2      | 80.63%        | 68.59%        | 74.45%        | 73.41%        | 69.78%        | 59.27%        | 71.02%        |

**Table S2.** Balanced accuracies of the sample entropy of the small subset of data with the test values of  $m$  and  $r_{SD}$ . Average reports the average accuracy across the band. Ordered from the highest average balanced accuracy to the lowest in the Average column.

| $m$ | $r_{SD}$ | Broad         | Delta         | Theta         | Alpha         | Beta          | Gamma         | Average       |
|-----|----------|---------------|---------------|---------------|---------------|---------------|---------------|---------------|
| 1   | 0.15     | 83.34%        | <b>79.16%</b> | 73.28%        | <b>80.65%</b> | 74.75%        | 68.06%        | <b>76.54%</b> |
| 1   | 0.1      | <b>84.14%</b> | 78.34%        | 77.12%        | 73.72%        | 71.91%        | 65.46%        | 75.11%        |
| 1   | 0.25     | 80.18%        | 77.13%        | 76.61%        | 73.83%        | 72.39%        | 64.56%        | 74.12%        |
| 2   | 0.15     | 79.82%        | 77.74%        | 73.81%        | 69.12%        | 75.68%        | 67.38%        | 73.92%        |
| 2   | 0.25     | 83.50%        | 73.07%        | <b>77.90%</b> | 69.06%        | 65.15%        | 67.62%        | 72.72%        |
| 2   | 0.1      | 80.43%        | 69.54%        | 72.86%        | 65.92%        | <b>75.94%</b> | <b>69.08%</b> | 72.30%        |
| 1   | 0.2      | 78.31%        | 71.01%        | 72.65%        | 70.36%        | 70.96%        | 62.74%        | 71.01%        |
| 2   | 0.2      | 79.00%        | 73.29%        | 71.14%        | 64.71%        | 67.31%        | 64.31%        | 69.96%        |

**Table S3.** Precisions of the entropy metrics for every classifier and EEG frequency band (ECG is included in every band). Bold values denote the highest precision amongst the classifiers for each EEG band and entropy measure.

| Features                                   | Classifiers | All           | Broad         | Delta         | Theta         | Alpha         | Beta          | Gamma         |
|--------------------------------------------|-------------|---------------|---------------|---------------|---------------|---------------|---------------|---------------|
| Renyi entropy                              | SVM         | 93.15%        | 81.03%        | 81.45%        | 83.42%        | 84.21%        | 82.41%        | 82.21%        |
|                                            | kNN         | <b>96.12%</b> | <b>88.25%</b> | <b>86.04%</b> | <b>91.00%</b> | <b>91.54%</b> | <b>92.63%</b> | <b>90.78%</b> |
|                                            | RF          | 92.80%        | 86.13%        | 85.15%        | 89.70%        | 89.01%        | 90.32%        | 89.10%        |
|                                            | GBM         | 86.14%        | 78.76%        | 79.96%        | 81.73%        | 81.42%        | 79.34%        | 81.28%        |
| Sample entropy<br>$m = 1, r = 0.15*SD$     | SVM         | 87.80%        | 81.57%        | <b>75.13%</b> | <b>77.33%</b> | <b>74.17%</b> | <b>74.81%</b> | 68.95%        |
|                                            | kNN         | <b>92.08%</b> | <b>84.30%</b> | 73.03%        | 75.21%        | 70.02%        | 74.49%        | 69.16%        |
|                                            | RF          | 82.82%        | 82.57%        | 74.93%        | 76.23%        | 70.33%        | 73.48%        | <b>69.49%</b> |
|                                            | GBM         | 80.77%        | 77.23%        | 72.82%        | 74.75%        | 71.04%        | 72.37%        | 69.35%        |
| Approximate entropy<br>$m = 2, r = 0.2*SD$ | SVM         | 89.00%        | 82.35%        | 74.22%        | 77.95%        | <b>76.65%</b> | 73.53%        | 69.31%        |
|                                            | kNN         | <b>92.49%</b> | <b>85.10%</b> | 72.56%        | 76.34%        | 75.67%        | <b>76.42%</b> | 70.04%        |
|                                            | RF          | 83.42%        | 83.59%        | <b>74.23%</b> | <b>78.35%</b> | 74.66%        | 74.96%        | <b>70.60%</b> |
|                                            | GBM         | 81.07%        | 78.11%        | 72.89%        | 74.93%        | 71.84%        | 72.48%        | 70.06%        |
| SVD entropy                                | SVM         | 87.37%        | 79.70%        | <b>73.32%</b> | <b>74.98%</b> | <b>73.05%</b> | 71.03%        | <b>66.86%</b> |
|                                            | kNN         | <b>90.49%</b> | 80.21%        | 68.72%        | 71.68%        | 70.42%        | 70.60%        | 63.33%        |
|                                            | RF          | 80.93%        | <b>80.35%</b> | 72.23%        | 74.03%        | 71.28%        | <b>72.45%</b> | 64.95%        |
|                                            | GBM         | 79.97%        | 76.95%        | 71.67%        | 73.47%        | 69.82%        | 71.18%        | 66.17%        |
| Spectral entropy                           | SVM         | 84.27%        | 79.54%        | <b>72.72%</b> | <b>73.56%</b> | <b>73.63%</b> | 71.93%        | 67.05%        |
|                                            | kNN         | <b>86.84%</b> | <b>80.81%</b> | 70.03%        | 69.84%        | 71.57%        | 73.77%        | 64.07%        |
|                                            | RF          | 77.03%        | 80.35%        | 72.53%        | 71.13%        | 72.30%        | <b>74.41%</b> | 67.04%        |
|                                            | GBM         | 77.47%        | 76.78%        | 71.26%        | 71.96%        | 70.41%        | 72.36%        | <b>68.67%</b> |
| Wavelet entropy                            | SVM         | 66.65%        | <b>64.99%</b> | <b>64.56%</b> | <b>71.00%</b> | 61.18%        | <b>61.12%</b> | 60.42%        |
|                                            | kNN         | <b>70.01%</b> | 62.34%        | 62.54%        | 66.91%        | 61.15%        | 60.15%        | 59.81%        |
|                                            | RF          | 63.91%        | 62.71%        | 62.10%        | 67.21%        | 60.53%        | 60.81%        | 60.71%        |
|                                            | GBM         | 66.55%        | 62.66%        | 62.49%        | 68.78%        | <b>61.41%</b> | 61.00%        | <b>61.77%</b> |

**Table S4.** Recalls of the entropy metrics for every classifier and EEG frequency band (ECG is included in every band). Bold values denote the highest recall amongst the classifiers for each EEG band and entropy measure.

| Features                                   | Classifiers | All           | Broad         | Delta         | Theta         | Alpha         | Beta          | Gamma         |
|--------------------------------------------|-------------|---------------|---------------|---------------|---------------|---------------|---------------|---------------|
| Renyi entropy                              | SVM         | 93.22%        | 80.50%        | 75.62%        | 87.55%        | 84.36%        | 86.84%        | 83.81%        |
|                                            | kNN         | 95.19%        | 83.16%        | 80.24%        | 88.79%        | 89.08%        | 89.67%        | 89.46%        |
|                                            | RF          | <b>96.92%</b> | <b>88.13%</b> | <b>84.65%</b> | <b>92.38%</b> | <b>92.00%</b> | <b>93.59%</b> | <b>91.32%</b> |
|                                            | GBM         | 83.70%        | 72.01%        | 70.92%        | 80.44%        | 81.52%        | 80.58%        | 80.77%        |
| Sample entropy<br>$m = 1, r = 0.15*SD$     | SVM         | 86.46%        | 65.53%        | 66.98%        | 61.53%        | 58.63%        | 53.28%        | 54.39%        |
|                                            | kNN         | 84.28%        | 77.00%        | 66.50%        | 65.96%        | 58.68%        | 65.99%        | 61.10%        |
|                                            | RF          | <b>87.35%</b> | <b>81.74%</b> | <b>73.03%</b> | <b>74.77%</b> | <b>70.87%</b> | <b>72.73%</b> | <b>71.88%</b> |
|                                            | GBM         | 74.00%        | 63.36%        | 62.64%        | 62.04%        | 58.74%        | 57.49%        | 60.68%        |
| Approximate entropy<br>$m = 2, r = 0.2*SD$ | SVM         | 87.82%        | 68.25%        | 63.26%        | 62.31%        | 65.47%        | 53.74%        | 52.14%        |
|                                            | kNN         | 86.28%        | 76.74%        | 65.99%        | 69.09%        | 66.84%        | 68.53%        | 61.88%        |
|                                            | RF          | <b>88.43%</b> | <b>81.77%</b> | <b>71.95%</b> | <b>76.52%</b> | <b>76.38%</b> | <b>74.34%</b> | <b>70.90%</b> |
|                                            | GBM         | 74.92%        | 64.72%        | 61.03%        | 63.15%        | 63.95%        | 59.45%        | 61.47%        |
| SVD entropy                                | SVM         | <b>85.20%</b> | 62.80%        | 55.52%        | 57.33%        | 58.33%        | <b>74.93%</b> | 53.25%        |
|                                            | kNN         | 77.01%        | 71.04%        | 61.39%        | 62.30%        | 61.38%        | 64.14%        | 54.66%        |
|                                            | RF          | 83.24%        | <b>79.01%</b> | <b>69.79%</b> | <b>69.09%</b> | <b>70.93%</b> | 74.79%        | <b>64.82%</b> |
|                                            | GBM         | 71.93%        | 61.57%        | 58.82%        | 57.99%        | 58.17%        | 67.93%        | 52.52%        |
| Spectral entropy                           | SVM         | 81.03%        | 63.06%        | 59.44%        | 57.06%        | 56.99%        | 74.38%        | 49.05%        |
|                                            | kNN         | 71.01%        | 71.65%        | 63.57%        | 60.31%        | 63.77%        | 66.04%        | 54.91%        |
|                                            | RF          | <b>81.25%</b> | <b>78.84%</b> | <b>72.14%</b> | <b>70.85%</b> | <b>72.52%</b> | <b>76.82%</b> | <b>68.14%</b> |
|                                            | GBM         | 69.63%        | 62.93%        | 60.72%        | 58.20%        | 59.10%        | 70.30%        | 53.71%        |
| Wavelet entropy                            | SVM         | 68.93%        | 51.53%        | 50.48%        | 55.93%        | 46.04%        | 54.90%        | 51.56%        |
|                                            | kNN         | 20.51%        | 53.74%        | 54.20%        | 55.01%        | 51.14%        | 47.21%        | 47.07%        |
|                                            | RF          | <b>73.44%</b> | <b>65.88%</b> | <b>65.19%</b> | <b>68.81%</b> | <b>63.77%</b> | <b>66.74%</b> | <b>65.85%</b> |
|                                            | GBM         | 59.26%        | 49.20%        | 48.28%        | 57.85%        | 45.66%        | 47.79%        | 48.56%        |
